# Supplementary material for: Characteristics of Crosslinking Polymers Play Major Roles in Improving the Stability and Catalytic Properties of Immobilized Thermomyces lanuginosus Lipase
Source: MDPI journal article supplement (doi:10.3390/ijms23062917), 2022-03-08
Supplement: s1 [file s1]

# Characteristics of Crosslinking Polymers Play Major Roles in Improving the Stability and Catalytic Properties of Immobilized *Thermomyces lanuginosus* Lipase

Yuhong Mao <sup>1,\*</sup>, Zhenling Cai <sup>1</sup>, Chenxi Zhou <sup>1</sup>, Hangzhen Lan <sup>2</sup> and Xiuyun Ye <sup>1</sup>

<sup>1</sup> Fujian Key Laboratory of Marine Enzyme Engineering, College of Biological Science and Technology, Fuzhou University, Fuzhou 350116, China; caizhenling0824@163.com (Z.C.); zcx5621175@163.com (C.Z.); xiuyunye@fzu.edu.cn (X.Y.)

<sup>2</sup> State Key Laboratory for Managing Biotic and Chemical Threats to the Quality and Safety of Agro-Products, College of Food and Pharmaceutical Sciences, Ningbo University, Ningbo 315211, China; hangzhen.lan@nbu.edu.cn

\* Correspondence: yuhong.mao@fzu.edu.cn

**Citation:** Mao, Y.; Cai, Z.; Zhou, C.; Lan, H.; Ye, X. Characteristics of Crosslinking Polymers Play Major Roles in Improving the Stability and Catalytic Properties of Immobilized *Thermomyces lanuginosus* Lipase. *Int. J. Mol. Sci.* **2022**, *23*, 2917. <https://doi.org/10.3390/ijms23062917>

Academic Editor: Jesús Fernandez Lucas

Received: 7 February 2022

Accepted: 4 March 2022

Published: 8 March 2022

**Publisher's Note:** MDPI stays neutral with regard to jurisdictional claims in published maps and institutional affiliations.

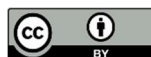

**Copyright:** © 2022 by the authors. Submitted for possible open access publication under the terms and conditions of the Creative Commons Attribution (CC BY) license (<https://creativecommons.org/licenses/by/4.0/>).

**Table S1.** Significance analysis for responses yield, activity and specific activity.

|             |    | Significance (P values) |          |          |                   |
|-------------|----|-------------------------|----------|----------|-------------------|
|             |    | Yield                   | Activity |          | Specific activity |
| Model       |    | < 0.0001                |          | < 0.0001 | < 0.0001          |
|             | A  | < 0.0001                | A        | 0.0055   | E                 |
|             | B  | < 0.0001                | B        | < 0.0001 | DE                |
|             | E  | < 0.0001                | C        | 0.0008   |                   |
|             | AB | 0.0023                  | E        | < 0.0001 |                   |
|             | AD | 0.0006                  | AE       | 0.0068   |                   |
| Lack of Fit |    | 0.5743                  |          | 0.9258   | 0.9281            |

Note: factor A-lipase concentration (mg/mL); factor B-ethanol fraction (% v/v); factor C-NaCl addition (mol/L); factor D-temperature (°C); factor E-pH.

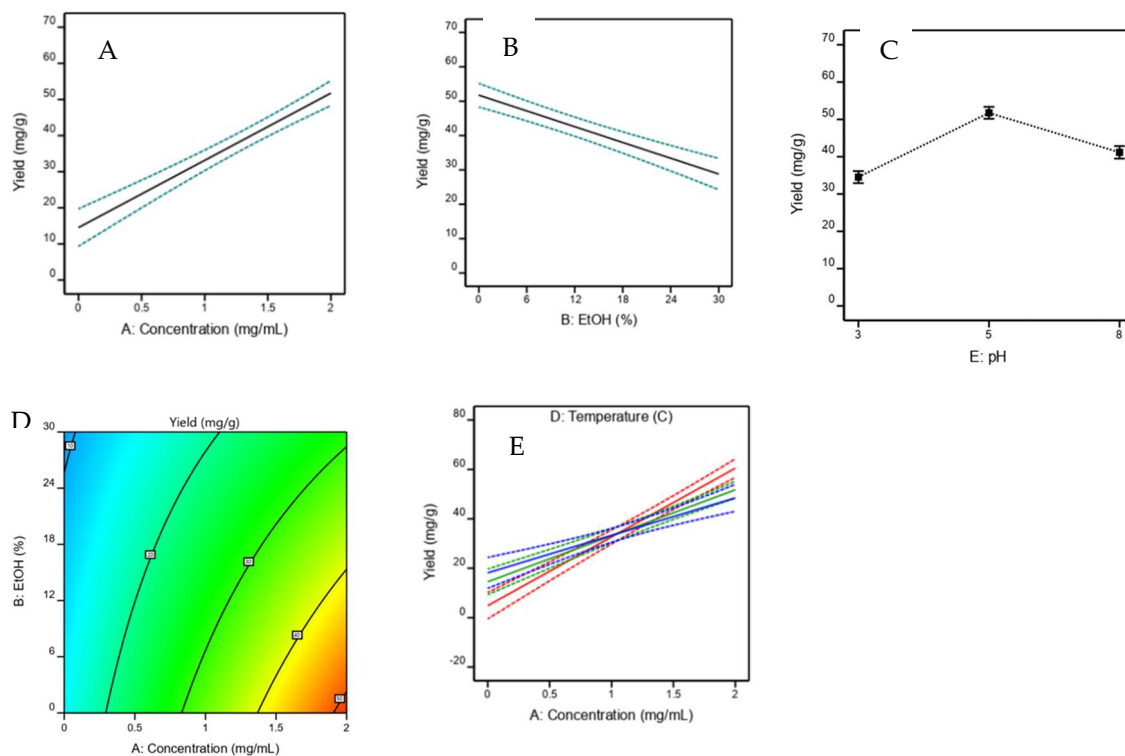

**Figure S1.** The influence of significant factors on the immobilization yield. (A) concentration; (B) ethanol fraction; (C) pH values; (D) interaction between ethanol fraction and concentration; (E) interaction between temperature and concentration.

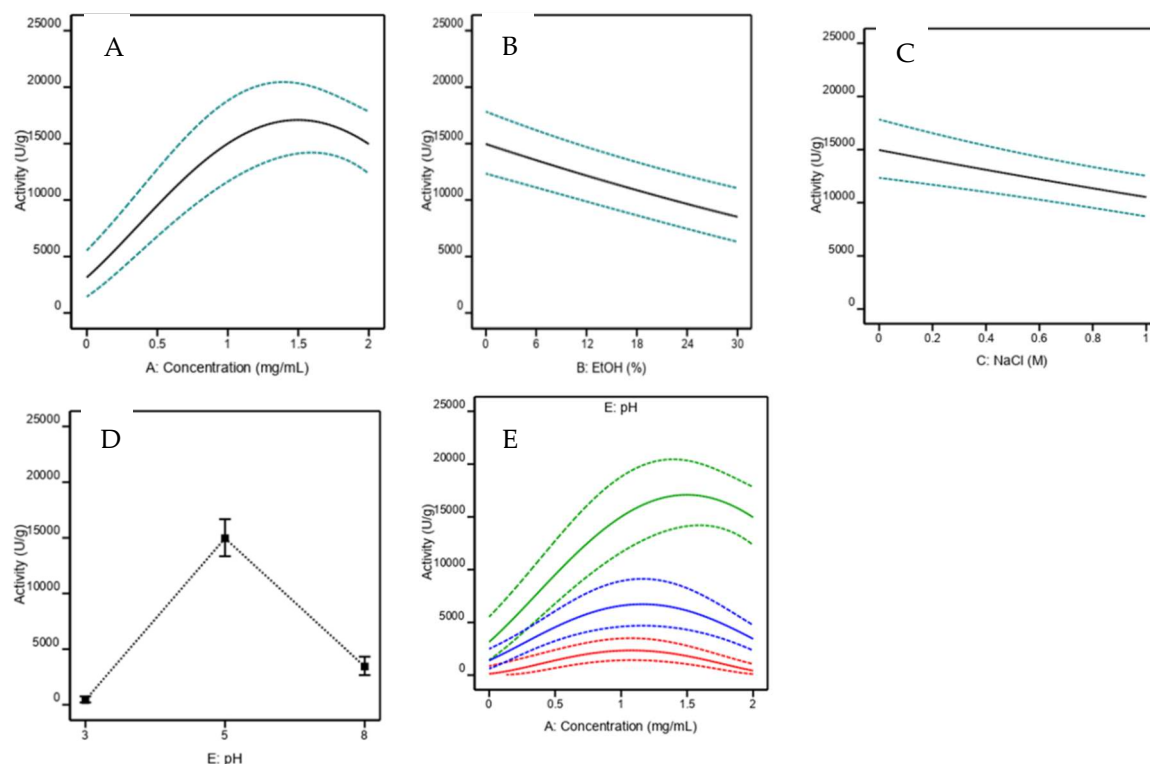

**Figure S2.** The influence of significant factors on the activity. (A) concentration; (B) ethanol fraction; (C) NaCl concentration; (D) pH values; (E) interaction between pH values and concentration.

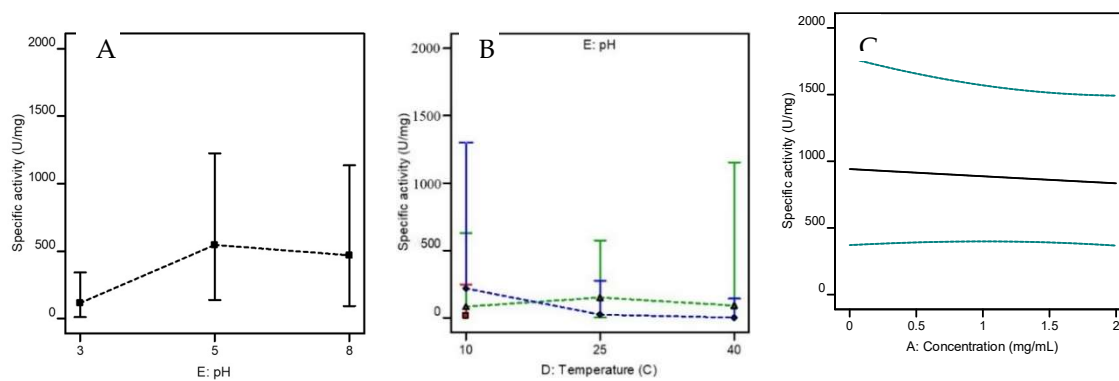

**Figure S3.** The influence of significant factors on the specific activity. (A) pH values; (B) interaction between pH and temperature; (C) concentration (insignificant).

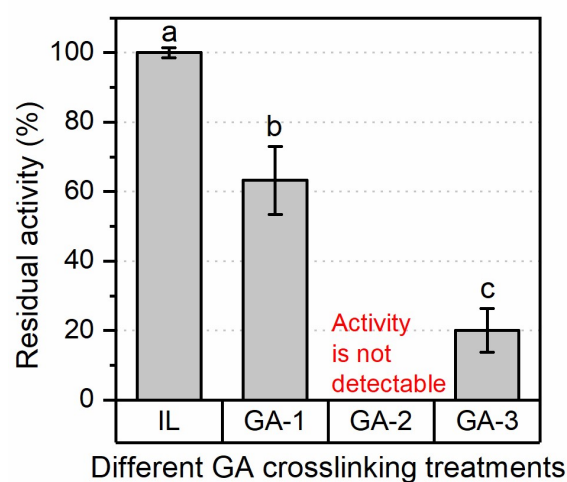

**Figure S4.** Influence of different glutaraldehyde (GA) treatments on the residual activity. IL: immobilized lipase via adsorption; GA-1: IL crosslinked via 1% GA for 15 min; GA-2: IL crosslinked via 10% GA for 15 min; GA-3: IL crosslinked via 1% GA for 1 h.

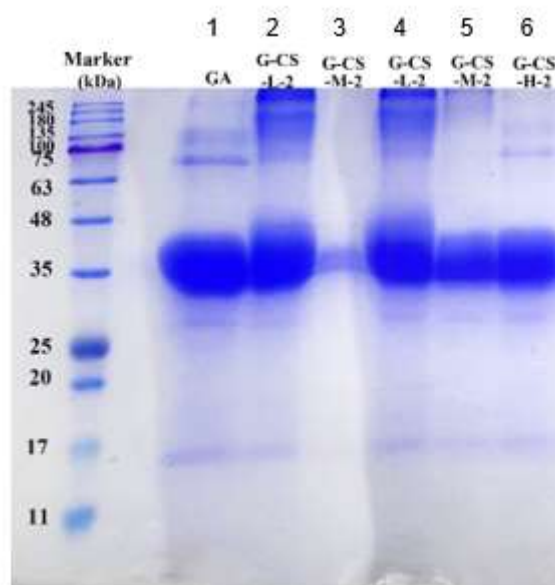

**Figure S5.** Original SDS-PAGE pattern of various modified immobilized lipase preparations. Lane 3 was due to an experimental mistake.
